# Supplementary material for: Synthesis of reduced graphene oxide-conducting polymers-Co3O4 composites and their excellent microwave absorption properties
Source: Royal Society of Chemistry journal article supplement (doi:10.1039/c3ra43073a), 2013-01-01
Supplement: c3ra43073a.pdf [file c3ra43073a.pdf]

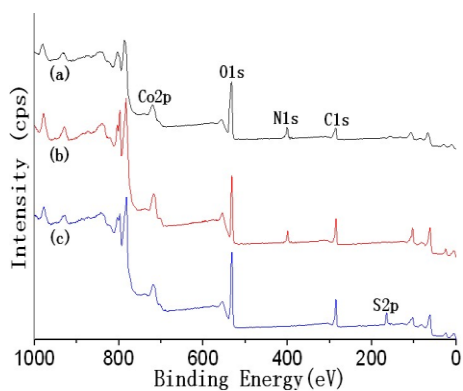

Fig. S1 XPS spectrum of RGO-PANI-Co<sub>3</sub>O<sub>4</sub> (a), RGO-PPy-Co<sub>3</sub>O<sub>4</sub> (b) and RGO-PEDOT-Co<sub>3</sub>O<sub>4</sub> (c).

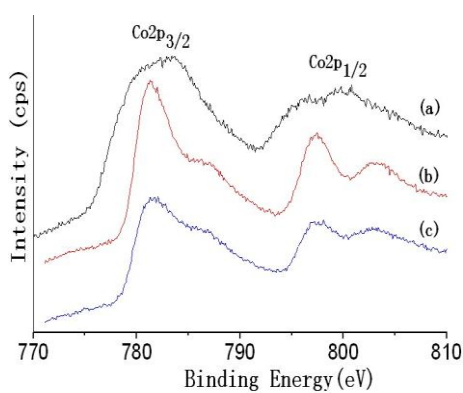

Fig. S2 Co 2p XPS spectra of RGO-PANI-Co<sub>3</sub>O<sub>4</sub> (a), RGO-PPy-Co<sub>3</sub>O<sub>4</sub> (b) and RGO-PEDOT-Co<sub>3</sub>O<sub>4</sub> (c).

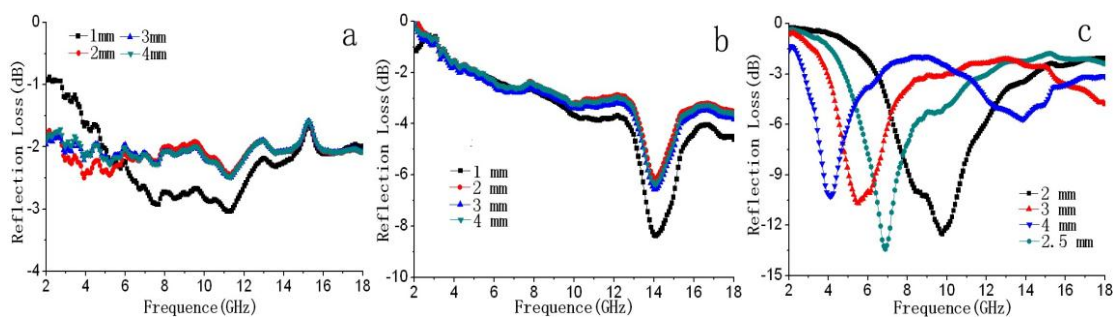

Fig. S3 The R<sub>L</sub> of RGO-PANI (a), RGO-PPy (b) and RGO-PEDOT (c).
